# Supplementary material for: Elevated IL-6 and IL-22 in Early Pregnancy Are Associated with Worse Disease Course in Women with Inflammatory Bowel Disease
Source: MDPI journal article supplement (doi:10.3390/ijms231810281), 2022-09-07
Supplement: s1 [file s1]

**Supplemental Table S1:** cytokine changes associated with post-partum active CD flare-up

| <b>Cytokines</b> | <b>t-statistic</b> | <b>P-value</b> |
|------------------|--------------------|----------------|
| CRP              | 0.0121             | 0.991          |
| IFN- $\gamma$    | -1.6643            | 0.117          |
| IL-27            | 0.1539             | 0.880          |
| IL-10            | 1.2652             | 0.225          |
| IL-12p70         | 0.3870             | 0.706          |
| IL-13            | -1.0466            | 0.318          |
| IL-1 $\beta$     | 0.0710             | 0.944          |
| IL-2             | 0.4056             | 0.694          |
| IL-21            | 0.8751             | 0.396          |
| IL-22            | -0.8174            | 0.427          |
| IL-23            | -0.7227            | 0.484          |
| IL-4             | -1.0392            | 0.323          |
| IL-6             | -1.2810            | 0.220          |
| IL-8             | -0.7335            | 0.475          |
| TNF $\alpha$     | -0.2740            | 0.788          |
| IL-5             | 1.0990             | 0.300          |
| IL-1 $\alpha$    | -0.4284            | 0.680          |
| IL-17            | 0.9483             | 0.360          |
| IL-12p40         | 0.2637             | 0.796          |

**Supplemental Table S2:** cytokine changes associated with post-partum active UC flare-up

| <b>Cytokines</b> | <b>t-statistic</b> | <b>P-value</b> |
|------------------|--------------------|----------------|
| CRP              | -1.2534            | 0.229          |
| IFN- $\gamma$    | -1.1054            | 0.286          |
| IL-27            | -0.9232            | 0.371          |
| IL-10            | 0.1881             | 0.853          |
| IL-12p70         | 0.8903             | 0.391          |
| IL-13            | 0.0352             | 0.972          |
| IL-1 $\beta$     | -1.0558            | 0.308          |
| IL-2             | 0.7084             | 0.493          |
| IL-21            | -1.3348            | 0.202          |
| IL-22            | -0.9264            | 0.370          |
| IL-23            | -0.1627            | 0.873          |
| IL-4             | 1.2186             | 0.242          |
| IL-6             | -1.0082            | 0.329          |
| IL-8             | -1.5161            | 0.150          |
| TNF $\alpha$     | -1.3483            | 0.198          |
| IL-5             | -2.1517            | 0.121          |
| IL-1 $\alpha$    | -1.2980            | 0.251          |
| IL-17            | -1.1324            | 0.278          |
| IL-12p40         | -1.7294            | 0.104          |

**Supplemental Table S3:** correlation between T1 cytokines and pregnancy outcomes among women with UC

| <b>T1 cytokines</b> | <b>Preterm</b> | <b>C-sections</b> | <b>Planned C-sections</b> |
|---------------------|----------------|-------------------|---------------------------|
| CRP                 | -0.065         | 0.028             | -0.306                    |
| IFN- $\gamma$       | 0.389          | -0.585*           | -0.131                    |
| IL-27               | 0.065          | -0.362            | -0.306                    |
| IL-10               | -0.194         | -0.53             | -0.48                     |
| IL-12p70            | -0.174         | -0.646*           | -0.174                    |
| IL-13               | -0.298         | -0.581            | -0.4                      |
| IL-1 $\beta$        | -0.224         | -0.075            | -0.2                      |
| IL-21               | 0              | -0.585*           | -0.218                    |
| IL-22               | -0.149         | 0.129             | 0.1                       |
| IL-23               | -0.13          | -0.53             | -0.131                    |
| IL-4                | -0.259         | -0.251            | -0.393                    |
| IL-6                | -0.324         | -0.474            | -0.48                     |
| IL-8                | 0.13           | -0.418            | 0.131                     |
| TNF- $\alpha$       | -0.194         | -0.753**          | -0.48                     |
| IL-17               | -0.453         | -0.585*           | -0.131                    |
| IL-12p40            | -0.324         | -0.362            | 0.306                     |

Pearson correlation coefficients, \*p < 0.05, \*\* p < 0.01.

**Supplemental Table S4:** correlation between T1 cytokines and pregnancy outcomes among women with CD

| <b>T1 cytokines</b> | <b>Birth weight</b> | <b>C-section</b> |
|---------------------|---------------------|------------------|
| TNF $\alpha$        | -0.221              | -0.147           |
| IFN- $\gamma$       | -0.256              | 0.098            |
| IL-1 $\alpha$       | -0.234              | 0.507            |
| IL-1 $\beta$        | -0.2                | 0.44             |
| IL-12p40            | 0.102               | 0.489            |
| IL-12p70            | -0.286              | -0.075           |
| IL-2                | 0.343               | 0.275            |
| IL-4                | 0.018               | 0                |
| IL-5                | 0.638               | 0.291            |
| IL-10               | -0.102              | -0.342           |
| IL-13               | -0.333              | 0                |
| IL-17               | -0.095              | 0.195            |
| IL-21               | 0.06                | 0.049            |
| IL-22               | -0.151              | 0.519            |
| IL-23               | 0.155               | -0.075           |
| IL-27               | -0.508              | 0.098            |
| CRP                 | -0.214              | -0.049           |
| IL-6                | -0.256              | 0.244            |
| IL-8                | -0.34               | 0.733**          |

Pearson correlation coefficients, \*\* p < 0.01.
